# Supplementary material
Source: Springer Nature journal article supplement (https://www.springermedizin.de/resource/supplementary/12882_2013_733_MOESM2_ESM.pdf/9454568)
Supplement: MOESM2 [file 9454568]

# Course of disease before and after admission for PCP

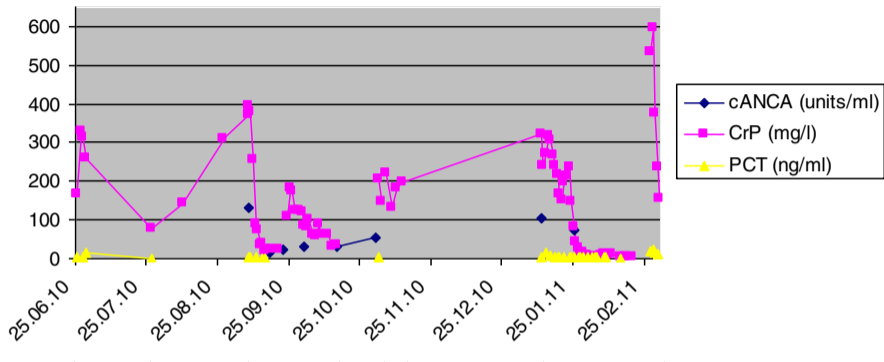

Hospitalization:  
Cyclophosphamide toxicity,  
Sepsis

Hospitalization:  
PCP\*

Hospitalization:  
Bronchitis\*\*

Hospitalization:  
Pneumogenic  
Sepsis\*\*\*,  
CMV colitis,  
influenza H1N1

\***Sputum:** *Pneumocystis jirovecii*, *Candida albicans*, *Peptostreptococcus miros*, *Actinomyces israelii*,

\*\***Bronchoscopy:** *Haemophilus parainfluenzae*, *Neisseria species*, *Streptococcus viridans group*

\*\*\***Bronchoscopy:** *Enterococcus faecium*, **Blood:** *Staphylococcus epidermidis*
